# Supplementary material for: Phosphoenolpyruvate Carboxylase Identified as a Key Enzyme in Erythrocytic Plasmodium falciparum Carbon Metabolism
Source: PLoS Pathog. 2014 Jan 16;10(1):e1003876. doi: 10.1371/journal.ppat.1003876 (PMC3894211; doi:10.1371/journal.ppat.1003876)
Supplement: Table S1 — Peak areas of selected metabolites after labelling infected RBC (6% parasitaemia) with 13C-U-L-glucose. Parasitaemia was 6%, labelling was performed for 28 h before cells were harvested and metabolites extracted. Shown are the peak areas calculated from the negative ionisation mode obtained by LC-MS. RBC, D10 wild type and D10Δpepc as well as spent media of all three cell types were analysed in this experiment. The data represent three biological replicates. (XLS) [file ppat.1003876.s007.xls]

## Sheet: Sheet1
11 mM 13C6 GLUCOSE LABELLING
6% PARASITEMIA, 5% HEMATOCRIT
28 HOURS LABELLING
Peak area calculated from the negative mode ionisation data
Metabolite: GLYCEROL-3-P
Formula:C3H9O6P
RT: 15.37-15.85
	Mass Range (Negative mode)	RBC-1	RBC-2	RBC-3	D10-1	D10-2	D10-3	ΔPEPC-1	ΔPEPC-2	ΔPEPC-3	mRBC-1	mRBC-2	mRBC-3	mD10-1	mD10-2	mD10-3	mΔPEPC-1	mΔPEPC-2	mΔPEPC-3		Mean RBC	RBC std dev	Mean D10	D10 std dev	Mean ΔPEPC	ΔPEPC std dev	Mean mRBC	mRBC std dev	Mean mD10	mD10 std dev	Mean mΔPEPC	mΔPEPC std dev
Glycerol-3-P 0	171.006-171.007	6113.05	10515.9	7214.73	8735.78	8037.72	12667.7	34893.3	13850.3	35411.5	0	0	0	2387.34	3966.54	11042.6	5872.09	6689.58	4753.28		7947.89	1870.72	9813.73	2038.07	28051.7	10044.2	0	0	5798.81	3763.52	5771.65	793.675
Glycerol-3-P 1	172.0093-172.0103	0	0	0	0	0	0	2151.27	2551.08	3069.29	0	0	0	0	0	0	0	0	0		0	0	0	0	2590.55	375.818	0	0	0	0	0	0
Glycerol-3-P 2	173.0127-173.0137	0	0	0	165.945	213.802	358.781	19527.1	8778.74	17900.2	0	0	0	0	0	0	0	0	0		0	0	246.176	81.9855	15402	4730.22	0	0	0	0	0	0
Glycerol-3-P 3	174.016-174.017	42524.5	54080.3	37215.5	69179.9	91503.5	132550	594419	266771	489631	0	0	0	16819.1	21560.8	38425.8	14350.9	21501.6	15360.6		44606.8	7040.67	97744.5	26244.4	450274	136626	0	0	25601.9	9272.19	17071	3159.88
Metabolite: PEP
Formula: C3H5O6P
RT: 18.39-18.95
	Mass Range (Negative mode)	RBC-1	RBC-2	RBC-3	D10-1	D10-2	D10-3	ΔPEPC-1	ΔPEPC-2	ΔPEPC-3	mRBC-1	mRBC-2	mRBC-3	mD10-1	mD10-2	mD10-3	mΔPEPC-1	mΔPEPC-2	mΔPEPC-3		Mean RBC	RBC std dev	Mean D10	D10 std dev	Mean ΔPEPC	ΔPEPC std dev	Mean mRBC	mRBC std dev	Mean mD10	mD10 std dev	Mean mΔPEPC	mΔPEPC std dev
PEP 0	166.9747-166.9757	41462	67632.6	50352	107932	147127	209233	102583	60020.4	100783	1317.43	1527.6	1528.96	21520.3	26442.5	28357.6	231386	262338	253855		53148.8	10865.6	154764	41706.9	87795.7	19653.9	1458	99.3994	25440.1	2879.92	249193	13058.9
PEP 1	167.978-167.979	3242.03	5348.61	4402.3	7276.74	11749	13481.2	3991.54	729.45	1258.42	0	0	0	0	0	0	6822.77	4416.7	4420.78		4330.98	861.486	10835.6	2614	1993.14	1429.49	0	0	0	0	5220.08	1133.27
PEP 2	168.9814-168.9824	37108.9	40896.3	38305.4	30712.9	42605.6	61685.5	38007.5	26745.4	42169.4	783.497	2363.92	295.908	5542.05	7937.84	4969.77	12301.4	10998	10797.4		38770.2	1580.75	45001.3	12757.5	35640.8	6515.42	1147.77	882.681	6149.89	1285.68	11365.6	666.759
PEP 3	169.9847-169.9857	447387	794709	595348	390676	534213	751876	682144	424186	715641	4758.35	14319.3	3953.41	119970	174100	190457	249467	259698	238580		612481	142310	558922	148491	607323	130218	7677.01	4708.27	161509	30122.3	249248	8622.54
Metabolite: LACTATE
Formula: C3H6O3
RT: 9.50-11.37
	Mass Range (Negative mode)	RBC-1	RBC-2	RBC-3	D10-1	D10-2	D10-3	ΔPEPC-1	ΔPEPC-2	ΔPEPC-3	mRBC-1	mRBC-2	mRBC-3	mD10-1	mD10-2	mD10-3	mΔPEPC-1	mΔPEPC-2	mΔPEPC-3		Mean RBC	RBC std dev	Mean D10	D10 std dev	Mean ΔPEPC	ΔPEPC std dev	Mean mRBC	mRBC std dev	Mean mD10	mD10 std dev	Mean mΔPEPC	mΔPEPC std dev
Lactate 0	89.024-89.025	111820	165422	157150	191341	131160	140164	209217	127174	160356	922470	975437	627138	3.59592e+06	3.61599e+06	1.13463e+07	2.48915e+06	2.33226e+06	1.53992e+06		144798	23562.1	154221	26503.3	165582	33697.2	841682	153239	6.18607e+06	3.64885e+06	2.12045e+06	415458
Lactate 1	90.0273-90.0283	6170.08	8584.04	6591.88	9241.3	8590.73	10219	11112.2	5070.78	7849.66	57199.6	68211.4	30980.8	212033	196599	561671	140952	169855	110431		7115.33	1052.71	9350.33	669.176	8010.88	2469.03	52130.6	15616.3	323434	168576	140413	24262.5
Lactate 2	91.0307-91.0317	18230.4	29917.4	16485.6	91108.9	98591.8	139452	38954.1	24120.5	29532.7	261433	335011	124322	2.57022e+06	2.63515e+06	6.54381e+06	749080	844904	567147		21544.4	5963.25	109718	21246.4	30869.1	6129.05	240255	87307.1	3.91639e+06	1.85806e+06	720377	115196
Lactate 3	92.034-92.035	715305	954696	756078	3.0303e+06	3.29094e+06	4.31145e+06	1.30087e+06	937611	1.13221e+06	8.28395e+06	1.04072e+07	4.05428e+06	7.03237e+07	7.21019e+07	1.69115e+08	2.39295e+07	2.50369e+07	1.64442e+07		808693	104573	3.54423e+06	552842	1.12356e+06	148427	7.58182e+06	2.64067e+06	1.03847e+08	4.61572e+07	2.18035e+07	3.8165e+06
Metabolite: MALATE
Formula: C4H6O5
RT: 16.94-17.28
	Mass Range (Negative mode)	RBC-1	RBC-2	RBC-3	D10-1	D10-2	D10-3	ΔPEPC-1	ΔPEPC-2	ΔPEPC-3	mRBC-1	mRBC-2	mRBC-3	mD10-1	mD10-2	mD10-3	mΔPEPC-1	mΔPEPC-2	mΔPEPC-3		Mean RBC	RBC std dev	Mean D10	D10 std dev	Mean ΔPEPC	ΔPEPC std dev	Mean mRBC	mRBC std dev	Mean mD10	mD10 std dev	Mean mΔPEPC	mΔPEPC std dev
Malate 0	133.0138-133.0148	758187	749336	140557	869262	1.09486e+06	1.43611e+06	121140	779029	623871	51275.6	167517	9548.38	161763	472287	853306	198707	88431.4	251327		549360	289090	1.13341e+06	233014	508014	280799	76113.6	66839.1	495785	282810	179488	67876.1
Malate 1	134.0172-134.0182	27074.7	33319.2	4065.05	40205	46306.4	63239.1	4788.69	33581.1	26638.2	1783.2	6138.3	641.187	7051.88	20112.8	34370.7	7423.65	4905.25	9098.92		21486.3	12579.7	49916.8	9744.01	21669.3	12268.3	2854.23	2368.53	20511.8	11156.4	7142.61	1723.55
Malate 2	135.0205-135.0215	0	0	0	4760.68	5462.81	8380.7	0	0	0	0	0	0	35.1244	2289.1	4808.9	0	0	0		0	0	6201.4	1567.43	0	0	0	0	2377.71	1949.89	0	0
Malate 3	136.0239-136.0249	1746.64	1795.8	174.519	90601.2	104300	150195	0	0	0	0	0	0	30725.4	76509.7	137871	0	0	0		1238.99	752.96	115032	25485.4	0	0	0	0	81702.1	43895.9	0	0
Malate 4	137.0272-137.0282	239.697	685.85	142.582	1718.64	2408.7	3623.84	0	0	0	0	0	0	946.507	1538.41	3296.01	141.084	125.32	360.494		356.043	236.555	2583.73	787.579	0	0	0	0	1926.97	997.755	208.966	107.34
Metabolite: FUMARATE
Formula: C4H4O4
RT: 16.97-17.31
	Mass Range (Negative mode)	RBC-1	RBC-2	RBC-3	D10-1	D10-2	D10-3	ΔPEPC-1	ΔPEPC-2	ΔPEPC-3	mRBC-1	mRBC-2	mRBC-3	mD10-1	mD10-2	mD10-3	mΔPEPC-1	mΔPEPC-2	mΔPEPC-3		Mean RBC	RBC std dev	Mean D10	D10 std dev	Mean ΔPEPC	ΔPEPC std dev	Mean mRBC	mRBC std dev	Mean mD10	mD10 std dev	Mean mΔPEPC	mΔPEPC std dev
Fumarate 0	115.0032-115.0042	67572.4	86657.6	110893	106312	145568	162277	84240.9	114658	108584	16919.9	17247.2	11380.3	50864.1	156285	58916.9	20126.5	25125.2	19752.7		88374.3	17727.1	138052	23457.7	102494	13143	15182.5	2691.85	88688.7	47910.8	21668.1	2449.25
Fumarate 1	116.0066-116.0076	1501.06	4073.91	2783.64	2575.16	5307.02	5379.01	2972.56	4397.73	3138.43	86.5456	351.922	234.262	332.005	4796.46	1533.55	81.8115	851.826	82.4089		2786.2	1050.36	4420.4	1305.11	3502.91	636.349	224.243	108.571	2220.67	1886.26	338.682	362.847
Fumarate 2	117.0099-117.0109	0	0	0	201.037	182.83	567.874	0	0	0	0	0	0	0	0	0	0	0	0		0	0	317.247	177.376	0	0	0	0	0	0	0	0
Fumarate 3	118.0133-118.0143	0	0	0	8864.2	11550.3	12570.3	0	0	0	0	0	0	8348.78	20295.1	8703.78	0	0	0		0	0	10994.9	1563.13	0	0	0	0	12449.2	5549.75	0	0
Fumarate 4	119.0167-119.0177	0	0	0	0	0	0	0	0	0	0	0	0	0	0	0	0	0	0		0	0	0	0	0	0	0	0	0	0	0	0
Metabolite: CITRATE
Formula: C6H8O7
RT: 19.09-20.26
	Mass Range (Negative mode)	RBC-1	RBC-2	RBC-3	D10-1	D10-2	D10-3	ΔPEPC-1	ΔPEPC-2	ΔPEPC-3	mRBC-1	mRBC-2	mRBC-3	mD10-1	mD10-2	mD10-3	mΔPEPC-1	mΔPEPC-2	mΔPEPC-3		Mean RBC	RBC std dev	Mean D10	D10 std dev	Mean ΔPEPC	ΔPEPC std dev	Mean mRBC	mRBC std dev	Mean mD10	mD10 std dev	Mean mΔPEPC	mΔPEPC std dev
Citrate 0	191.0193-191.0203	896511	1.03836e+06	877659	1.09096e+06	924804	1.26443e+06	1.79011e+06	256964	920759	5.54339e+06	7.94902e+06	1.10576e+07	2.22511e+07	1.33379e+07	1.42588e+07	1.71152e+07	1.7305e+07	1.89617e+07		937509	71725.2	1.0934e+06	138663	989279	627779	8.18333e+06	2.25724e+06	1.66159e+07	4.00238e+06	1.7794e+07	829323
Citrate 1	192.0226-192.0236	51854	60613.2	54110.4	66805	59522.2	79700.9	106981	15446.5	56324.8	390884	571287	773413	1.37657e+06	905565	1.05546e+06	1.19152e+06	1.15766e+06	1.00539e+06		55525.9	3713.36	68676	8343.48	59584.2	37440	578528	156251	1.11253e+06	196478	1.11819e+06	80947.3
Citrate 2	193.026-193.027	0	0	0	67644.6	75635.4	103133	0	0	0	0	0	0	0	0	0	0	0	0		0	0	82137.6	15200	0	0	0	0	0	0	0	0
Citrate 3	194.0293-194.0303	0	0	0	451.453	3250.59	3736.72	0	0	0	0	0	0	0	0	0	0	0	0		0	0	2479.59	1447.78	0	0	0	0	0	0	0	0
Citrate 4	195.0327-195.0337	0	0	0	0	0	0	0	0	0	0	0	0	0	0	0	0	0	0		0	0	0	0	0	0	0	0	0	0	0	0
Citrate 5	196.0361-196.0371	0	0	0	25834.6	24404.2	40830.4	0	0	0	0	0	0	0	0	0	0	0	0		0	0	30356.4	7429.25	0	0	0	0	0	0	0	0
Citrate 6	197.0394-197.0404	0	0	0	0	0	0	0	0	0	0	0	0	0	0	0	0	0	0		0	0	0	0	0	0	0	0	0	0	0	0
Metabolite: ASPARTATE
Formula: C4H7NO4
RT: 15.62-16.09
	Mass Range (Negative mode)	RBC-1	RBC-2	RBC-3	D10-1	D10-2	D10-3	ΔPEPC-1	ΔPEPC-2	ΔPEPC-3	mRBC-1	mRBC-2	mRBC-3	mD10-1	mD10-2	mD10-3	mΔPEPC-1	mΔPEPC-2	mΔPEPC-3		Mean RBC	RBC std dev	Mean D10	D10 std dev	Mean ΔPEPC	ΔPEPC std dev	Mean mRBC	mRBC std dev	Mean mD10	mD10 std dev	Mean mΔPEPC	mΔPEPC std dev
Aspartate 0	132.0298-132.0308	2.80351e+06	2.67711e+06	3.00153e+06	2.36352e+06	2.33787e+06	2.35851e+06	1.49143e+06	1.13583e+06	1.78855e+06	4.23037e+06	3.6613e+06	3.29659e+06	2.4252e+06	4.68057e+06	5.75666e+06	1.87092e+06	3.57469e+06	2.27273e+06		2.82738e+06	133516	2.3533e+06	11102.5	1.47194e+06	266827	3.72942e+06	384246	4.28747e+06	1.38818e+06	2.57278e+06	727202
Aspartate 1	133.0331-133.0341	109639	113294	126957	75155	75816.4	75221.3	58431.7	37333.5	71729.9	163092	162530	138894	91701.1	182538	230437	34841.6	153778	84961.9		116630	7452.99	75397.6	297.362	55831.7	14162.1	154838	11276.6	168226	57535.8	91194	48755.3
Aspartate 2	134.0365-134.0375	599.615	548.712	844.873	6937.11	7780.36	5737.48	0	0	0	672.155	621.062	111.137	861.523	1943.44	2731.91	934.432	352.711	710.287		664.4	129.294	6818.31	838.221	0	0	468.118	253.284	1845.63	766.71	665.81	239.56
Aspartate 3	135.0398-135.0408	0	0	0	121357	119337	123487	0	0	0	0	0	0	986.039	1756.27	4324.6	0	0	0		0	0	121393	1694.75	0	0	0	0	2355.64	1427.33	0	0
Aspartate 4	136.0432-136.0442	0	0	0	1148.16	1292.04	1390.26	0	0	0	0	0	0	0	0	0	0	0	0		0	0	1276.82	99.4231	0	0	0	0	0	0	0	0
Metabolite: SEDOHEPTULOSE7P
Formula: C7H15O10P
RT: 16.84-17.38
	Mass Range (Negative mode)	RBC-1	RBC-2	RBC-3	D10-1	D10-2	D10-3	ΔPEPC-1	ΔPEPC-2	ΔPEPC-3	mRBC-1	mRBC-2	mRBC-3	mD10-1	mD10-2	mD10-3	mΔPEPC-1	mΔPEPC-2	mΔPEPC-3		Mean RBC	RBC std dev	Mean D10	D10 std dev	Mean ΔPEPC	ΔPEPC std dev	Mean mRBC	mRBC std dev	Mean mD10	mD10 std dev	Mean mΔPEPC	mΔPEPC std dev
Sedoheptulose7P 0	289.0326-289.0336	6780.84	7016.81	6655.76	1419.96	183.534	1566.5	50937.6	30174	56579.8	0	0	0	0	0	0	0	0	0		6817.81	149.698	1056.67	620.289	45897.1	11354	0	0	0	0	0	0
Sedoheptulose7P 1	290.0359-290.0369	235.341	683.858	129.73	0	0	0	4032.9	3530.65	4741.73	0	0	0	0	0	0	0	0	0		349.643	240.226	0	0	4101.76	496.813	0	0	0	0	0	0
Sedoheptulose7P 2	291.0393-291.0403	1027.72	1460.57	640.353	540.85	401.5	57.9155	0	0	0	0	0	0	0	0	0	0	0	0		1042.88	335.022	333.422	202.949	0	0	0	0	0	0	0	0
Sedoheptulose7P 3	292.0426-292.0436	1361.54	2963.47	234.017	293.842	459.241	481.206	852.02	342.578	637.054	0	0	0	0	0	0	0	0	0		1519.68	1119.89	411.43	83.6295	610.551	208.822	0	0	0	0	0	0
Sedoheptulose7P 4	293.046-293.047	4659.87	1614.67	3406.21	1501.82	1065.63	762.519	3292.95	947.593	3611.37	0	0	0	0	0	0	0	0	0		3226.92	1249.65	1109.99	303.445	2617.31	1187.8	0	0	0	0	0	0
Sedoheptulose7P 5	294.0493-294.0503	9149.43	7991.05	7203.86	2172.89	3863.6	5091.34	2616.83	2304.68	3228.63	0	0	0	0	0	0	0	0	0		8114.78	799.081	3709.28	1196.44	2716.71	383.755	0	0	0	0	0	0
Sedoheptulose7P 6	295.0527-295.0537	10540.8	12671.2	10154.6	6488.26	6417.35	6134.62	10334.9	8546.89	13343	0	0	0	0	0	0	0	0	0		11122.2	1106.62	6346.75	152.759	10741.6	1979.02	0	0	0	0	0	0
Sedoheptulose7P 7	296.056-296.057	38967.9	38533.7	31818.6	24469.8	23816.9	31030.7	71802.5	47333.4	74055.6	0	0	0	0	0	0	0	0	0		36440.1	3272.68	26439.1	3257.64	64397.1	12100.9	0	0	0	0	0	0
Metabolite: RIBULOSE-5-P/RIBOSE-5-P
Formula: C5H11O8P
RT: 16.22-16.94
	Mass Range (Negative mode)	RBC-1	RBC-2	RBC-3	D10-1	D10-2	D10-3	ΔPEPC-1	ΔPEPC-2	ΔPEPC-3	mRBC-1	mRBC-2	mRBC-3	mD10-1	mD10-2	mD10-3	mΔPEPC-1	mΔPEPC-2	mΔPEPC-3		Mean RBC	RBC std dev	Mean D10	D10 std dev	Mean ΔPEPC	ΔPEPC std dev	Mean mRBC	mRBC std dev	Mean mD10	mD10 std dev	Mean mΔPEPC	mΔPEPC std dev
Ribulose-5-P/Ribose-5-P 0	229.0114-229.0124	0	0	0	0	0	0	0	0	0	0	0	0	0	0	0	6766.22	1738.3	662.038		0	0	0	0	0	0	0	0	0	0	3055.52	2660.4
Ribulose-5-P/Ribose-5-P 1	230.0148-230.0158	0	0	0	0	0	0	0	0	0	0	0	0	0	0	0	0	0	0		0	0	0	0	0	0	0	0	0	0	0	0
Ribulose-5-P/Ribose-5-P 2	231.0181-231.0191	0	0	0	0	0	0	1217.03	692.765	1145.71	0	0	0	0	0	0	2155.63	440.025	157.794		0	0	0	0	1018.5	232.163	0	0	0	0	917.817	882.818
Ribulose-5-P/Ribose-5-P 3	232.0215-232.0225	0	0	0	0	0	0	0	0	0	0	0	0	0	0	0	5379.04	2207.85	1664.54		0	0	0	0	0	0	0	0	0	0	3083.81	1638.06
Ribulose-5-P/Ribose-5-P 4	233.0249-233.0259	0	0	0	0	0	0	0	0	0	0	0	0	0	0	0	0	0	0		0	0	0	0	0	0	0	0	0	0	0	0
Ribulose-5-P/Ribose-5-P 5	234.0282-234.0292	18168.3	28446.1	9422.64	7460.45	14288.8	22204.3	62310.1	30503.8	51306.1	0	0	0	78.334	2385.09	4953.21	32116.9	20855.9	28959.3		18679	7774.68	14651.2	6024.6	48040	13188.6	0	0	2472.21	1991.11	27310.7	4742.8
Metabolite: GLYCERALDEHYDE-3-P/DHAP
Formula: C3H7O6P
RT: 15.88-16.49
	Mass Range (Negative mode)	RBC-1	RBC-2	RBC-3	D10-1	D10-2	D10-3	ΔPEPC-1	ΔPEPC-2	ΔPEPC-3	mRBC-1	mRBC-2	mRBC-3	mD10-1	mD10-2	mD10-3	mΔPEPC-1	mΔPEPC-2	mΔPEPC-3		Mean RBC	RBC std dev	Mean D10	D10 std dev	Mean ΔPEPC	ΔPEPC std dev	Mean mRBC	mRBC std dev	Mean mD10	mD10 std dev	Mean mΔPEPC	mΔPEPC std dev
Glyceraldehyde-3-P/DHAP 0	168.9903-168.9913	411.66	647.05	890.985	0	0	0	0	0	0	0	0	0	0	0	0	0	0	0		649.898	195.694	0	0	0	0	0	0	0	0	0	0
Glyceraldehyde-3-P/DHAP 1	169.9937-169.9947	0	0	0	0	0	0	0	0	0	0	0	0	0	0	0	0	0	0		0	0	0	0	0	0	0	0	0	0	0	0
Glyceraldehyde-3-P/DHAP 2	170.997-170.998	0	0	0	0	0	0	0	0	0	0	0	0	0	0	0	0	0	0		0	0	0	0	0	0	0	0	0	0	0	0
Glyceraldehyde-3-P/DHAP 3	172.0004-172.0014	47825.7	74567.9	40761.6	13785.8	31942.7	34020.8	61572.7	33656.5	96798.6	0	0	0	7192.42	10459.6	26120.1	7814.69	6497.07	8067.66		54385.1	14559.9	26583.1	9088.72	64009.3	25835.2	0	0	14590.7	8260.88	7459.8	688.548
